# Supplementary material for: IL-1β promotes adipogenesis by directly targeting adipocyte precursors
Source: PubMed Central journal article supplement (PMC11390900; doi:10.1038/s41467-024-51938-x), 2024-09-11
Supplement: 41467_2024_51938_MOESM1_ESM.pdf [file 41467_2024_51938_MOESM1_ESM.pdf]

**IL-1 $\beta$  promotes adipogenesis by directly targeting adipocyte precursors**

## **Supplementary Information**

**This file includes Supplementary Figures 1-11 and Supplementary Table 1**

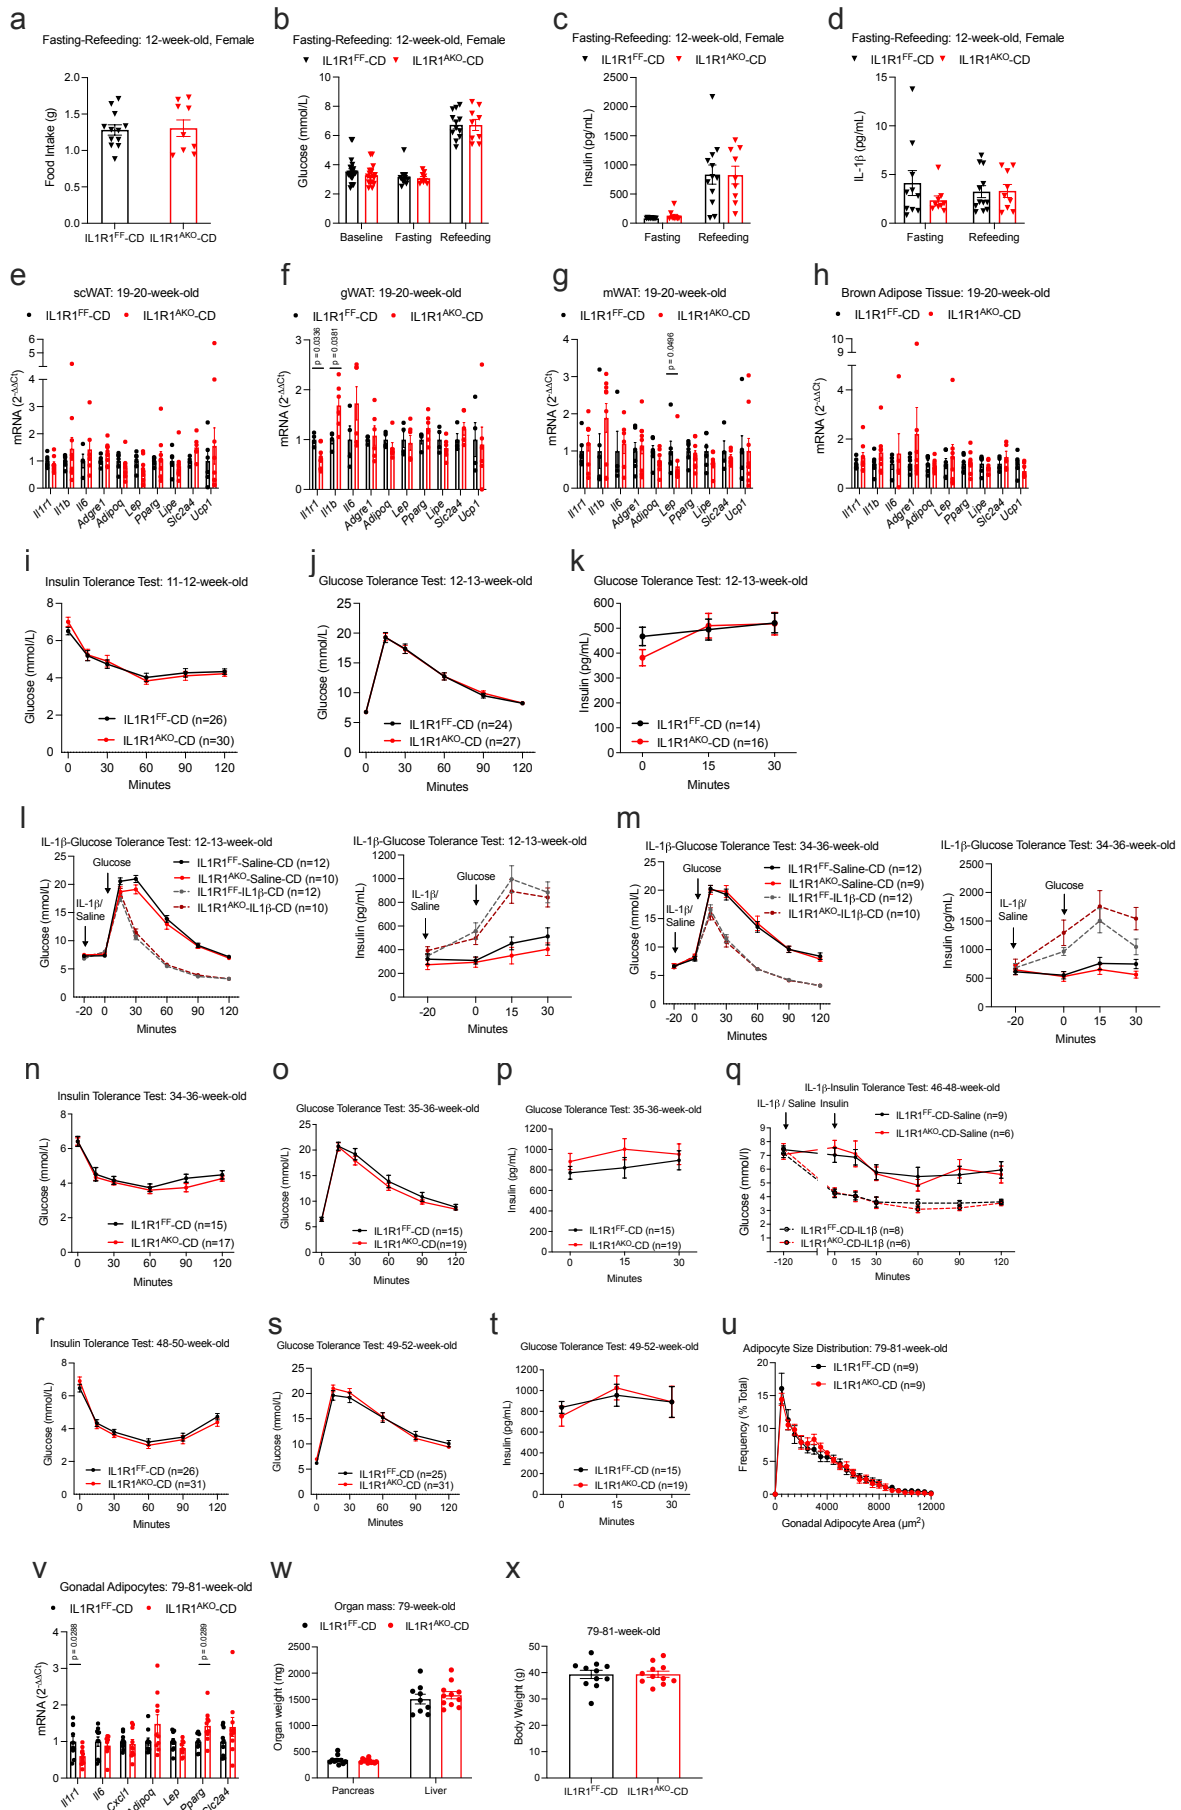

**Supplementary Fig. 1. Chow-fed IL1R1<sup>AKO</sup> mice have no metabolic phenotype (related to Fig. 1).** (a-d) Food intake (a), glucose (b), insulin (c), and IL-1 $\beta$  (d) levels during fasting-refeeding experiment in 12-week-old chow-fed female mice. Food intake, refeeding glucose, insulin, and IL-1 $\beta$ : n=12 IL1R1<sup>FF</sup>, n=9 IL1R1<sup>AKO</sup>. Fasting glucose, insulin, and IL-1 $\beta$ : n=10 IL1R1<sup>FF</sup>, n=9 IL1R1<sup>AKO</sup>. Glucose baseline: n=22 IL1R1<sup>FF</sup>, n=18 IL1R1<sup>AKO</sup>.

(e-h) Relative mRNA expression in scWAT (e), gWAT (f), mWAT (g), and brown adipose tissue (BAT) (h) of 19-20-week-old chow-fed male mice. n=4 IL1R1<sup>FF</sup>, n=6 IL1R1<sup>AKO</sup> for *Ilf6* and *Slc2a4*; n=6 IL1R1<sup>FF</sup>, n=9 IL1R1<sup>AKO</sup> for remaining genes (e, g). n=4 IL1R1<sup>FF</sup>, n=9 IL1R1<sup>AKO</sup> for *Ilf1r1*; n=4 IL1R1<sup>FF</sup>, n=6 IL1R1<sup>AKO</sup> for remaining genes (f). n=4 IL1R1<sup>FF</sup>, n=5 IL1R1<sup>AKO</sup> for *Ilf6* and *Slc2a4*; n=6 IL1R1<sup>FF</sup>, n=8 IL1R1<sup>AKO</sup> for remaining genes (h).

(i-k) Insulin tolerance test (i), glucose tolerance test (j), and insulin levels (k) in 11-12- (i) and 12-13-week-old (j-k) male mice. n=26 IL1R1<sup>FF</sup>, n=30 IL1R1<sup>AKO</sup> (i), n=24 IL1R1<sup>FF</sup>, n=27 IL1R1<sup>AKO</sup> (j), n=14 IL1R1<sup>FF</sup> and n=16 IL1R1<sup>AKO</sup> (k).

(l, m) Concentration of circulating glucose and insulin during a glucose tolerance test in 12-13- (l) and 34-36-week-old (m) male chow-fed mice. An injection of saline or IL-1 $\beta$  (1  $\mu$ g/kg bw) was administrated 20 minutes before the glucose bolus. n=12 IL1R1<sup>FF</sup>, n=10 IL1R1<sup>AKO</sup> (l). n=12 IL1R1<sup>FF</sup>, n=9 IL1R1<sup>AKO</sup>-saline, n=10 IL1R1<sup>AKO</sup>-IL-1 $\beta$  (m).

(n-p) Insulin tolerance test (n), glucose tolerance test (o), and insulin levels (p) in 34-36- (n) and 35-36-week-old (o, p) male mice. n=15 IL1R1<sup>FF</sup>, n=17 IL1R1<sup>AKO</sup> (n). n=15 IL1R1<sup>FF</sup>, n=19 IL1R1<sup>AKO</sup> (o, p).

(q) Concentration of circulating glucose during an insulin tolerance test in 46-48-week-old male chow-fed mice. An injection of saline or IL-1 $\beta$  (1  $\mu$ g/kg bw) was administrated 20 minutes before the insulin bolus (1.4 U/kg bw). n=9 IL1R1<sup>FF</sup>-saline, n=8 IL1R1<sup>FF</sup>-IL-1 $\beta$ , n=6 IL1R1<sup>AKO</sup>.

(r-t) Insulin tolerance test (r), glucose tolerance test (s), and insulin levels (t) in 48-50- (r) and 49-52-week-old (s, t) chow-fed male mice. n=26 IL1R1<sup>FF</sup>, n=31 IL1R1<sup>AKO</sup> (r). n=25 IL1R1<sup>FF</sup>, n=31 IL1R1<sup>AKO</sup> (s). n=15 IL1R1<sup>FF</sup>, n=19 IL1R1<sup>AKO</sup> (t).

(u-x) Cell size distribution (u), relative mRNA expression in adipocytes from gWAT (v), and organ and body weight (w-x) in 79-81-week-old chow-fed male mice. n=9 (u). n=10 IL1R1<sup>FF</sup>, n=9 IL1R1<sup>AKO</sup> for *Ilf6* and *Lep*, n=10 for remaining genes (v). n=10 IL1R1<sup>FF</sup>, n=11 IL1R1<sup>AKO</sup> for pancreas. n=9 IL1R1<sup>FF</sup>, n=11 IL1R1<sup>AKO</sup> for liver (w). n=11 (x).

n = biological replicates. Data are shown as individual measurements and mean  $\pm$  SEM. Statistical analyses were performed by two-way ANOVA and Šidák's multiple comparison test (i-u) or unpaired nonparametric two-tailed Mann-Whitney U test (all other panels). Source data are provided as a Source Data File.

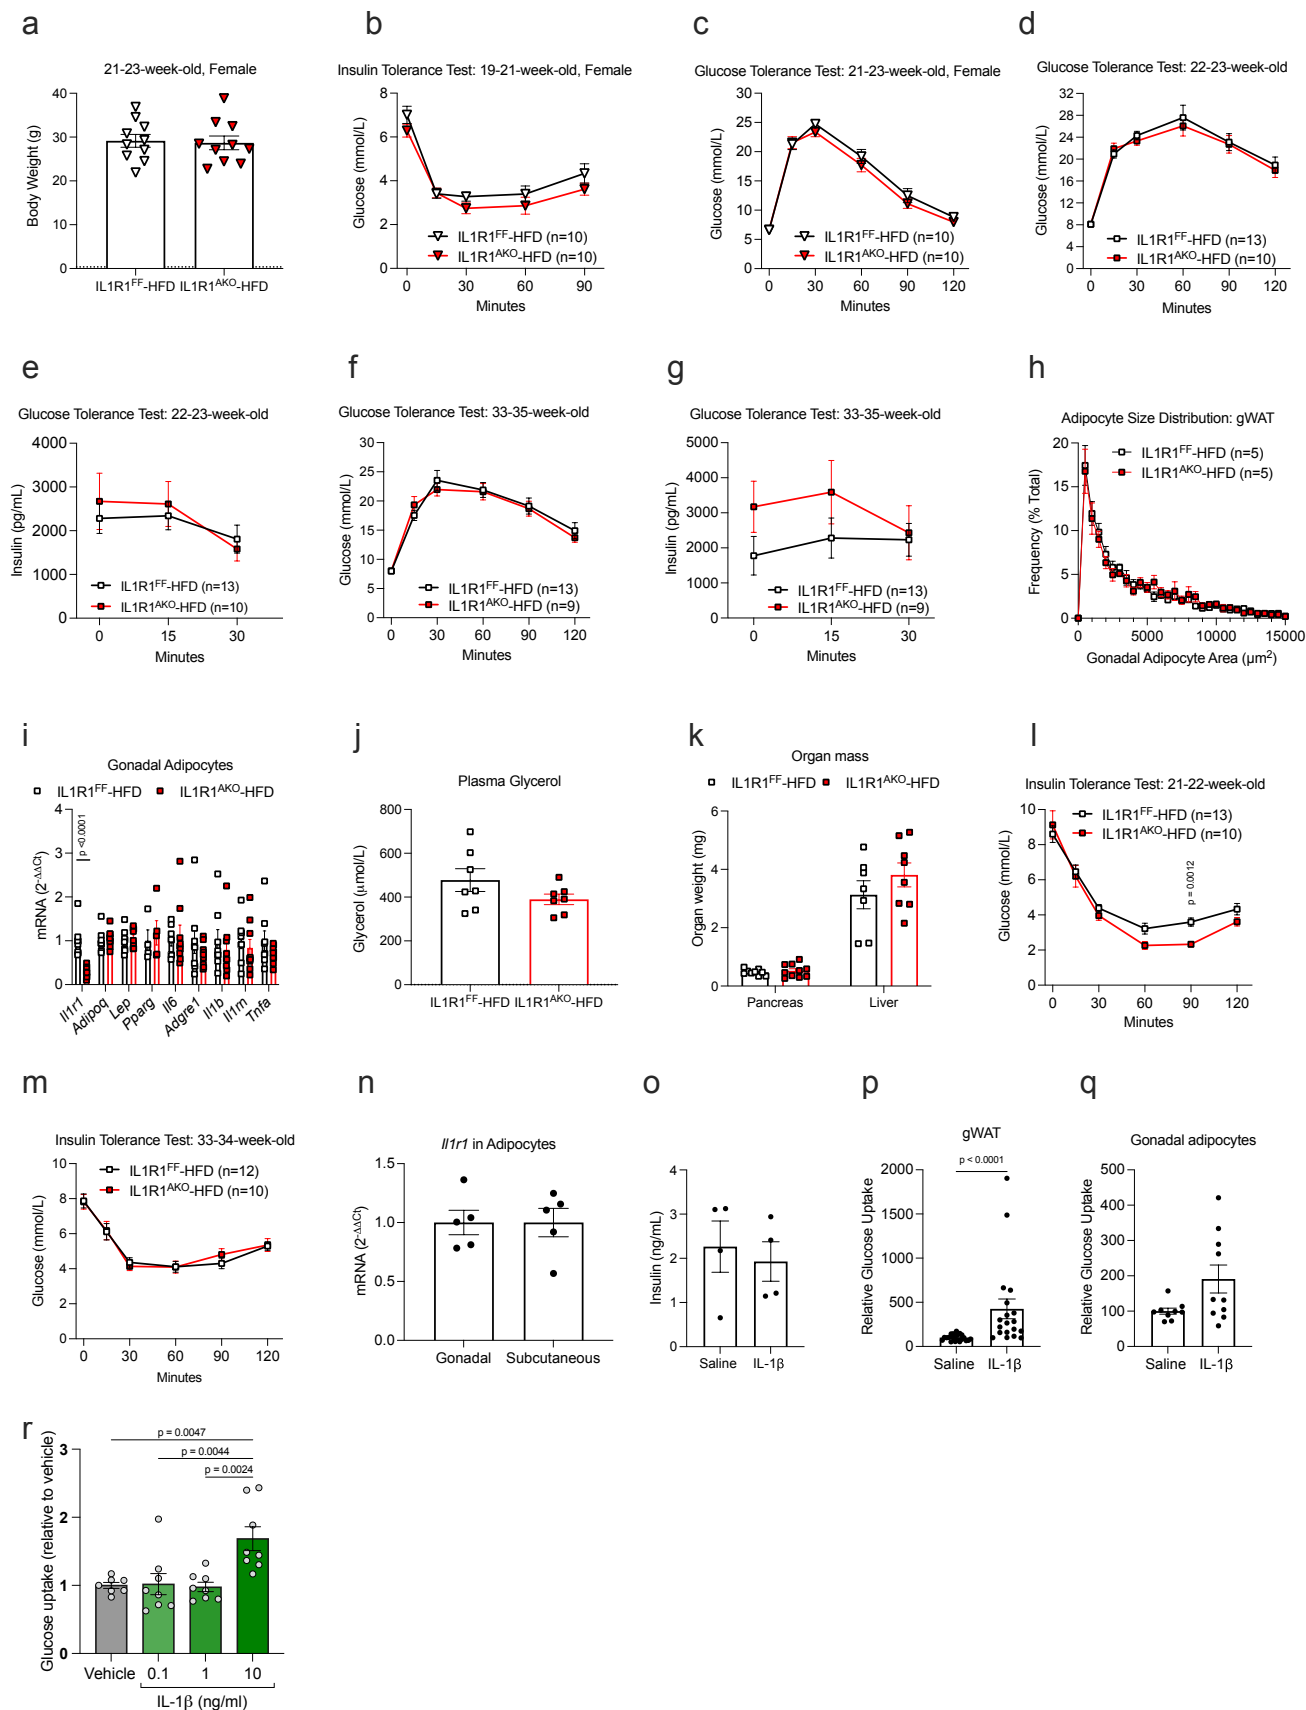

**Supplementary Fig. 2. Female HFD-fed IL1R1<sup>AKO</sup> mice have no metabolic phenotype while HFD-fed IL1R1<sup>AKO</sup> male mice show a mild insulin phenotype (related to Fig. 1).**

(a-c) Body weight (a), insulin tolerance test (b), and glucose tolerance test (c) in 21-23- (a, c) and 19-21-week-old (b) HFD-fed female mice (n=10).

(d, e) Glucose tolerance test (d) and insulin levels (e) in 22-23-week-old HFD-fed male mice. n=13 IL1R1<sup>FF</sup>, n=10 IL1R1<sup>AKO</sup>.

(f, g) Glucose tolerance test (f) and insulin levels (g) in 33-35-week-old HFD-fed male mice. n=13 IL1R1<sup>FF</sup>, n=9 IL1R1<sup>AKO</sup>.

(h-k) Cell size distribution (h), relative mRNA expression in adipocytes from gWAT (i), plasma glycerol (j) and organ weight (k) of 40-45-week-old HFD-fed male mice. n=5 (h). n=4 IL1R1<sup>FF</sup>, n=5 IL1R1<sup>AKO</sup> for *Pparg*; n=8 IL1R1<sup>FF</sup>, n=9 IL1R1<sup>AKO</sup> for remaining genes (i). n=7 (j). n=9 IL1R1<sup>FF</sup>, n=10 IL1R1<sup>AKO</sup> for pancreas. n=7 IL1R1<sup>FF</sup>, n=8 IL1R1<sup>AKO</sup> for liver (k).

(**l, m**) Insulin tolerance test in 21-22- (**l**) and 33-34-week-old (**m**) HFD-fed male mice. n=13 IL1R1<sup>FF</sup>, n=10 IL1R1<sup>AKO</sup> (**l**). n=12 IL1R1<sup>FF</sup>, n=10 IL1R1<sup>AKO</sup> (**m**).

(**n**) Relative mRNA levels of *I1r1* in adipocytes from gWAT and scWAT of 12-week-old male mice (n = 5).

(**o-q**) Insulin levels (**o**) and glucose uptake in gWAT (**p**) and gonadal adipocytes (**q**) of WT mice treated with saline or IL-1 $\beta$  (1  $\mu$ g/kg bw) 18 minutes prior to euthanasia and tissue harvesting. n=4 (**o**). n=21 saline, n=19 IL-1 $\beta$  (**p**). n=9 saline, n=10 IL-1 $\beta$  (**q**).

(**r**) Glucose uptake in *in vitro* differentiated human adipocytes treated with indicated concentrations of IL-1 $\beta$  for 2 h (n= 4 independent experiments with 1-2 replicates (7 datapoints for vehicle and 8 for the rest)).

HFD-feeding started at 10 weeks of age. n=biological replicates (**a-q**). Data are shown as individual measurements and mean  $\pm$  SEM. Statistical analyses were performed by unpaired nonparametric two-tailed Mann-Whitney U test (**a, i-k, n-q**), one-way ANOVA and Tukey's multiple comparisons test (**r**), or two-way ANOVA and Šidák's multiple comparisons test (all other panels). Source data are provided as a Source Data File.

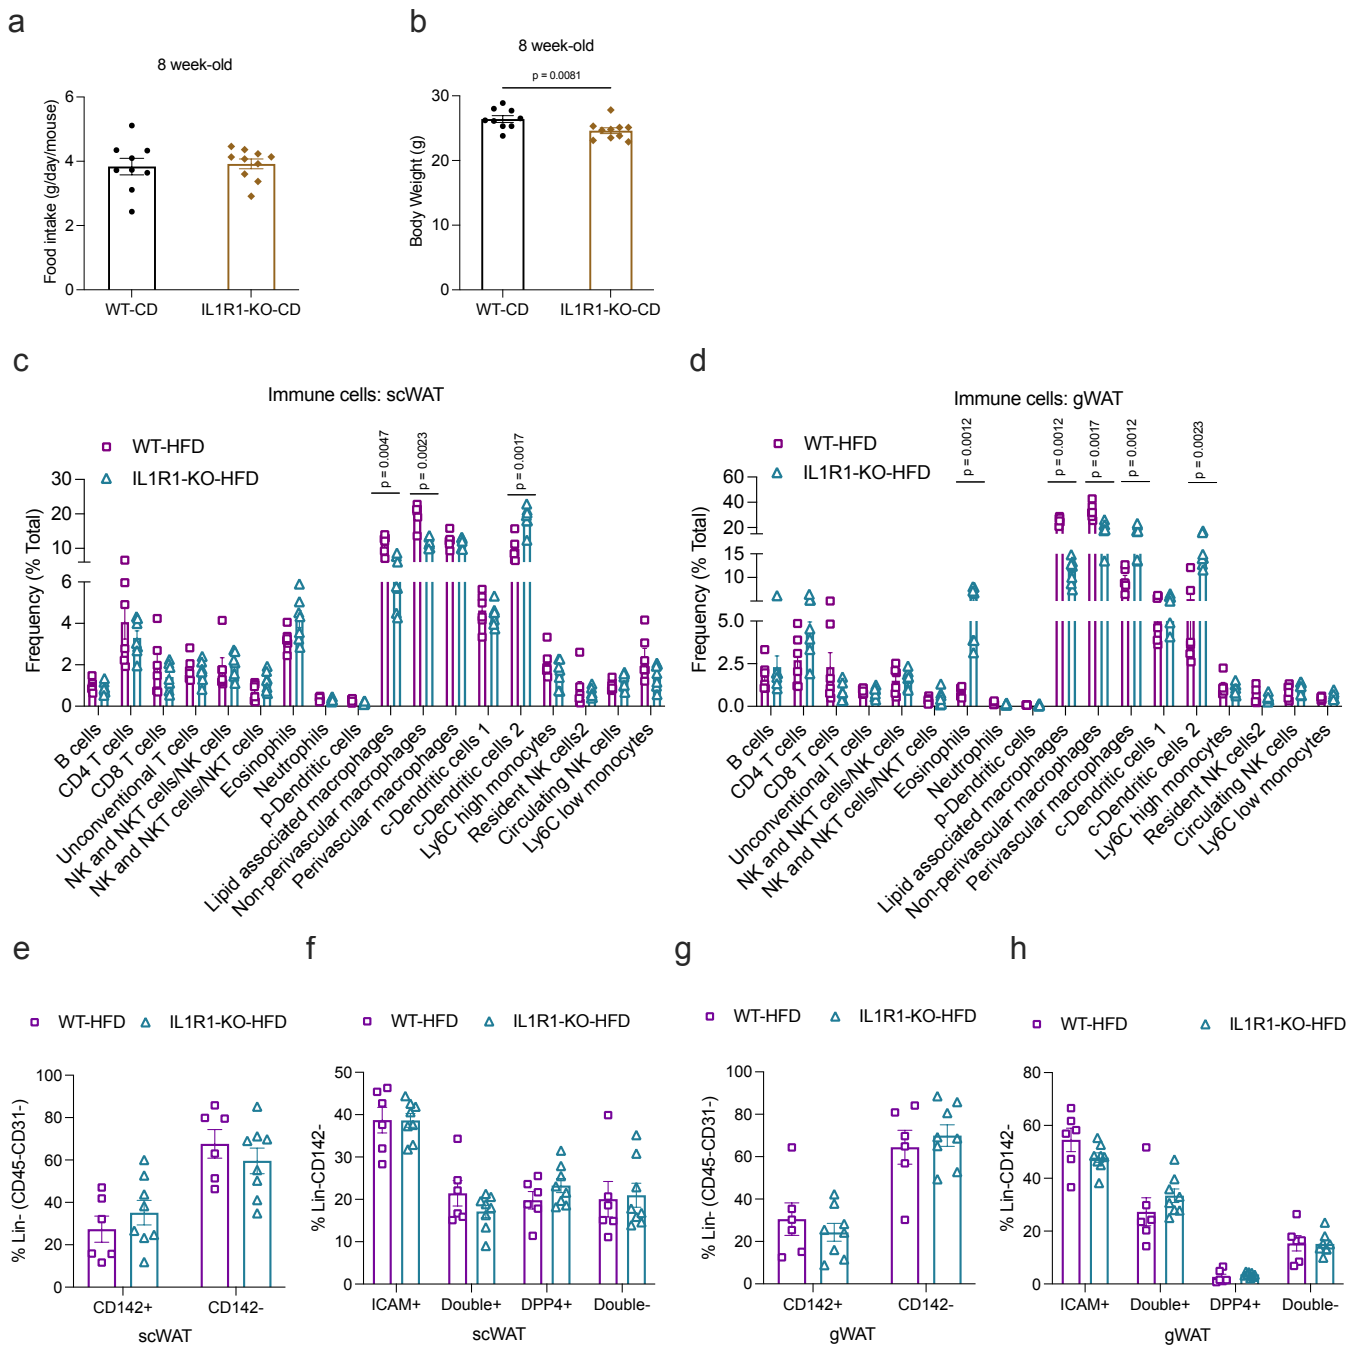

**Supplementary Fig. 3. IL1R1 ablation does not affect food intake nor adipocyte progenitor subpopulations but alters myeloid cell proportions in WAT (Related to Fig. 2).**

(a, b) Food intake (a) and body weight (b) of 8-week-old male chow-fed IL1R1-KO and WT mice. n=9 IL1R1-WT, n=10 IL1R1-KO.

(c, d) Proportions of immune cell subpopulations in scWAT (c) and gWAT (d) of 17-week-old HFD-fed IL1R1-KO and WT mice. n=6 IL1R1-WT, n=7 IL1R1-KO.

(e-h) Proportions of adipocyte progenitor subpopulations in scWAT (e, f) and gWAT (g, h) of 9-week-old IL1R1-KO and WT mice HFD-fed for 1 week. n=6 IL1R1-WT, n=8 IL1R1-KO.

Data are shown as individual measurements and mean  $\pm$  SEM. Statistical analyses were performed by unpaired nonparametric two-tailed Mann-Whitney U test. Source data are provided as a Source Data File.

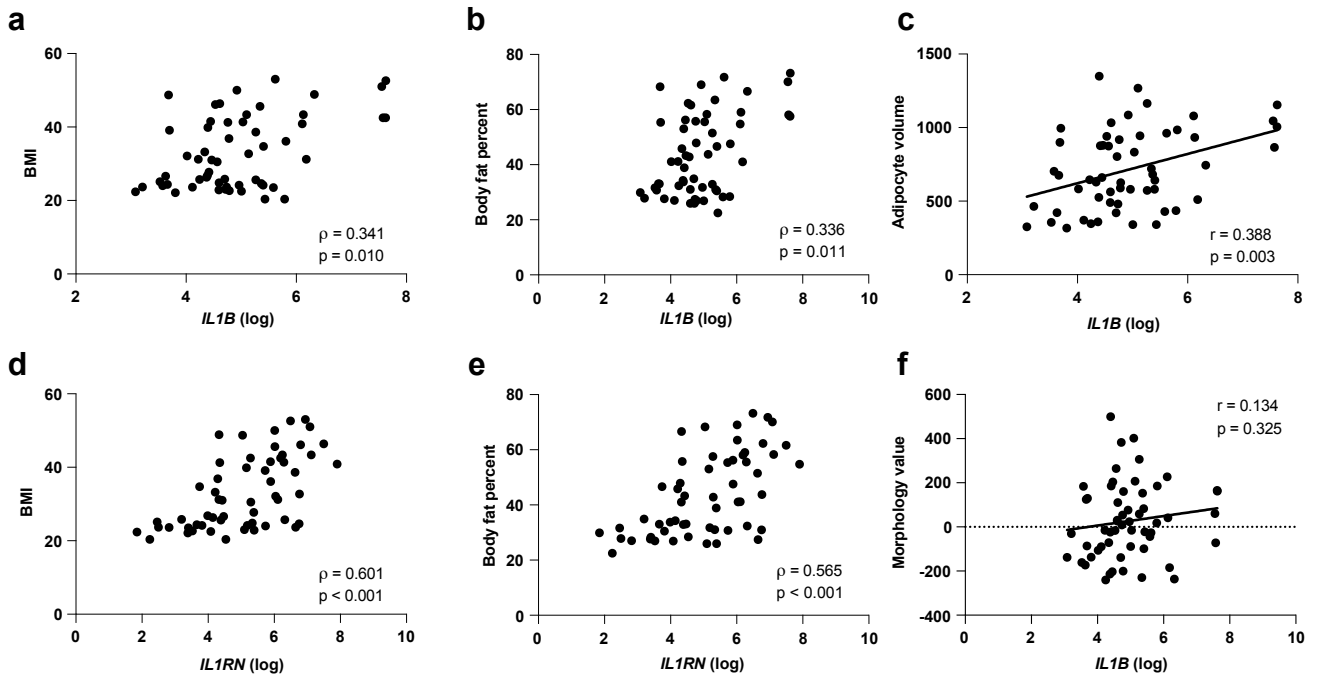

**Supplementary Fig. 4. Characterization of the IL-1 $\beta$  system in human scWAT (related to Figure 3).**

(a-c) Pearson (r coefficient) or Spearman ( $\rho$  coefficient) correlations between human scWAT mRNA expression of *IL1B* and BMI (a), body fat percent (b), or adipocyte volume (c) (n=56).

(d, e) Spearman ( $\rho$  coefficient) correlations between human scWAT mRNA expression of *IL1RN* and BMI (d) or body fat percent (e) (n=56).

(f) Pearson (r coefficient) correlation between human scWAT mRNA expression of *IL1B* and WAT morphology value (n=56).

Two-tailed p-values.

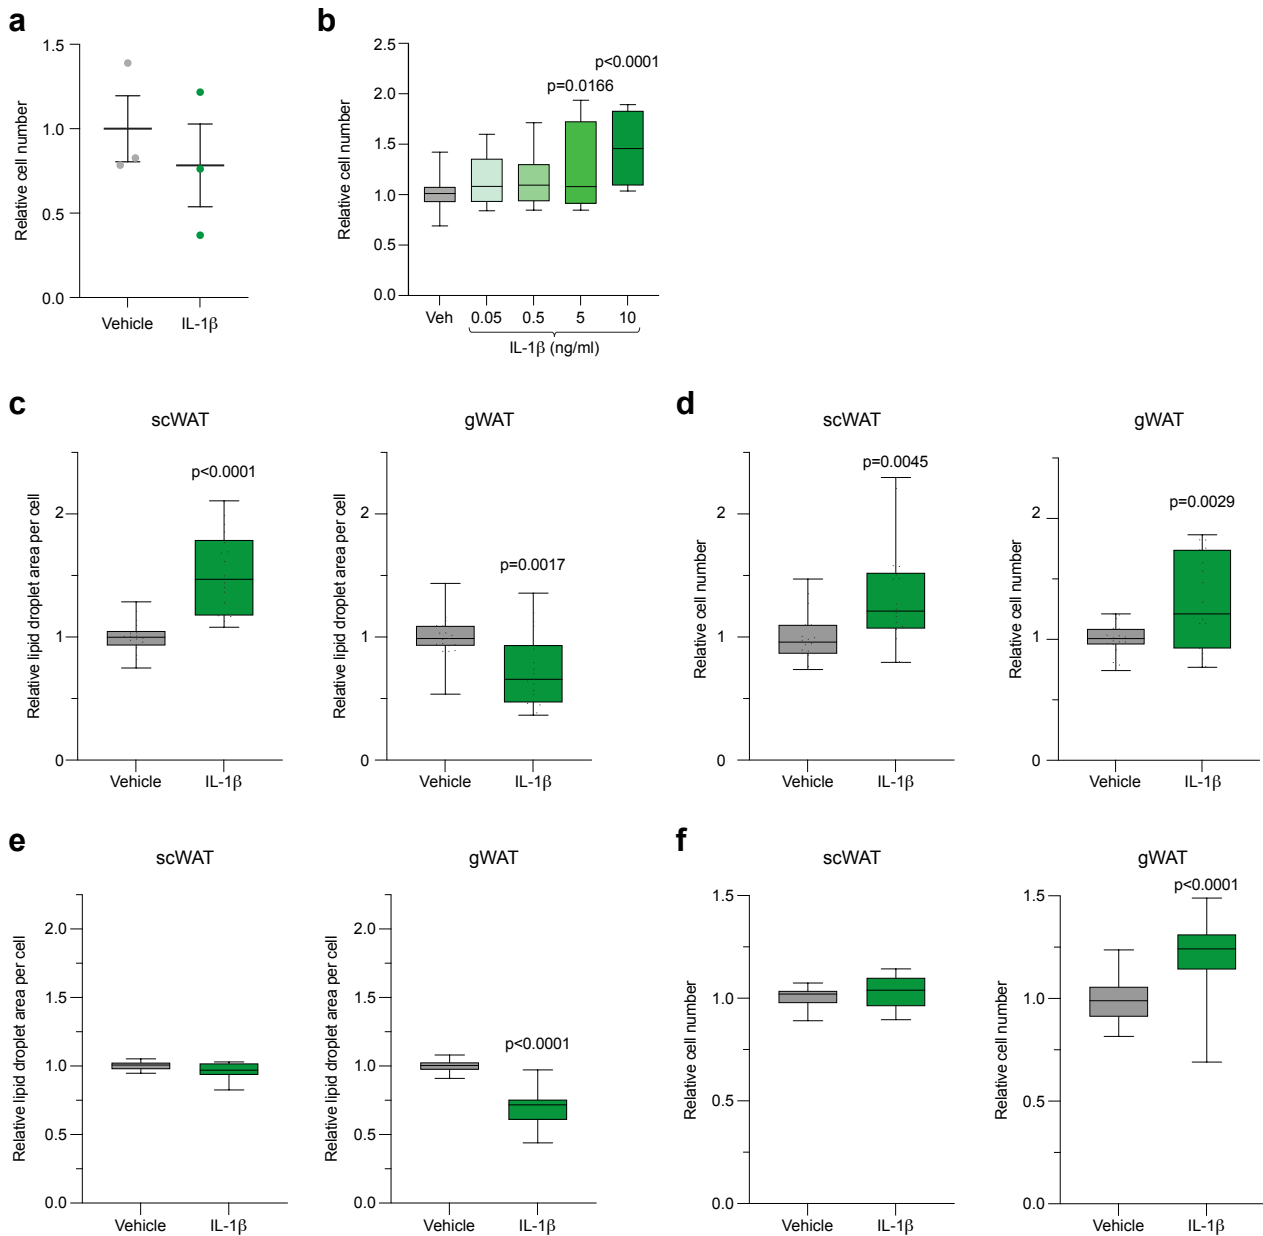

**Supplementary Fig. 5. Cell number and lipid droplet accumulation in IL-1 $\beta$ -treated WAT-derived progenitors** (related to Fig. 4).

(**a, b**) Cell number in experiments described in Fig. 4b (**a**, n = 3 donors) and 4d (**b**, n = 3 independent experiments with  $\geq 4$  replicates (35 datapoints in vehicle and 12 in rest)).

(**c, d**) Lipid droplet accumulation (**c**) and cell number (**d**) in CD45<sup>-</sup> stromal vascular cells from scWAT and gWAT of 8–9-week-old male mice, differentiated with or without IL-1 $\beta$  (10 ng/ml) (n = 5 independent experiments, 3 pooled mice with 2–4 replicates per experiment (18 (scWAT) and 19 (gWAT) datapoints)).

(**e, f**) Lipid droplet accumulation (**e**) and cell number (**f**) in CD45<sup>-</sup> stromal vascular cells from scWAT and gWAT of male *ob/ob* mice, differentiated with or without IL-1 $\beta$  (10 ng/ml) (n = 3 independent experiments with 1–16 replicates (scWAT: 11 (vehicle) and 9 (IL-1 $\beta$ ) datapoints; gWAT: 26 (vehicle) and 23 (IL-1 $\beta$ ) datapoints)).

Statistical analyses by paired (**a**) or unpaired (**c–f**) two-tailed *t* test, or one-way ANOVA and Dunnett's multiple comparisons test compared to vehicle (**b**). Data are represented as individual measurements and mean  $\pm$  SEM or box-and-whisker plots (line inside box = median; box limits = first and third quartiles; whisker ends = minima and maxima). Source data are provided as a Source Data File.



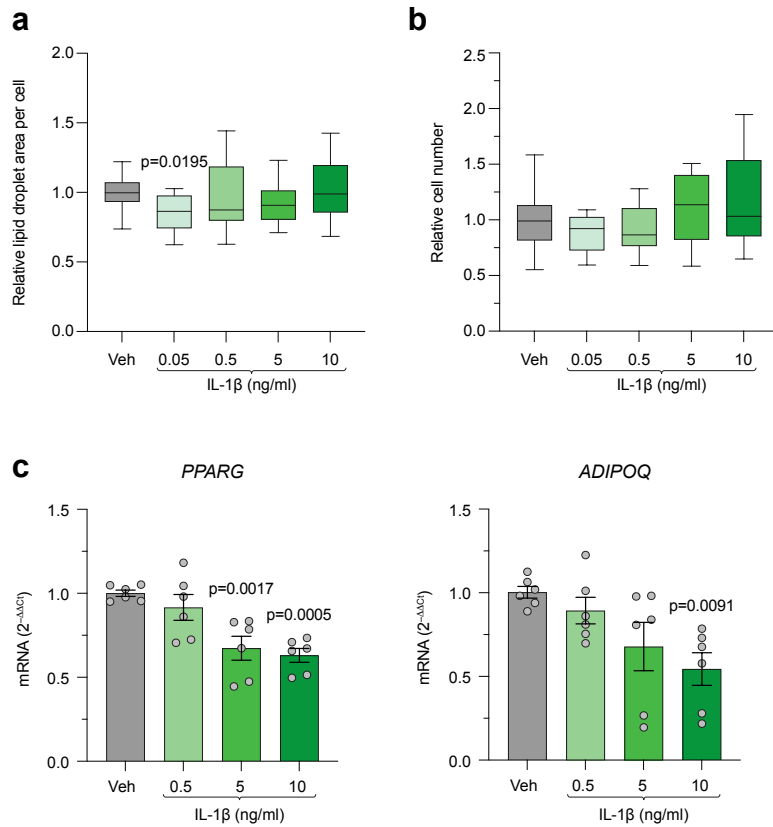

**Supplementary Fig. 6. Effect of long-term IL-1 $\beta$  treatment on adipogenesis** (related to Fig. 5).

(a-b) Lipid droplet accumulation (a) and cell number (b) in hASCs differentiated for 13 days with IL-1 $\beta$  (10 ng/ml) (n = 3 independent experiments with  $\geq 4$  replicates (35 datapoints in vehicle and 12 in the rest)).

(c) *PPARG* and *ADIPOQ* expression in hASCs differentiated for 13 days with IL-1 $\beta$  (10 ng/ml) (n = 3 independent experiments with 2 replicates).

Statistical analyses by one-way ANOVA and Dunnett's multiple comparisons test compared to vehicle. Data are represented as box-and-whisker plots (line inside box = median; box limits = first and third quartiles; whisker ends = minima and maxima) or individual data points and mean  $\pm$  SEM. Source data are provided as a Source Data File.

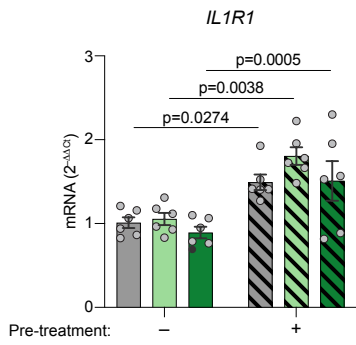

**Supplementary Fig. 7. *IL1R1* expression in response to pre-treatment** (related to Fig. 6).

*IL1R1* expression in the same experiment as described in Fig. 6c-d. Conditions are color/pattern coded as in Fig. 6b-d. Statistical analyses by two-way ANOVA and Šidák's and Tukey's multiple comparisons tests ( $n = 3$  independent experiments with 2 replicates). Data are represented as individual data points and mean  $\pm$  SEM. Source data are provided as a Source Data File.

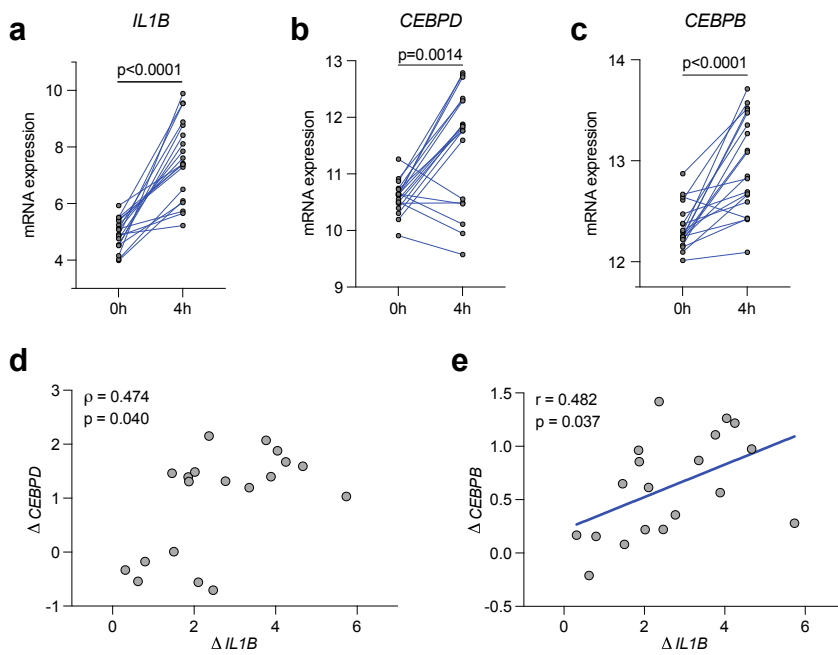

**Supplementary Fig. 8. *IL1B*, *CEBPD* and *CEBPB* are upregulated in human scWAT postprandially.**

(a-c) Normalized expression values of *IL1B* (a), *CEBPD* (b), and *CEBPB* (c) at baseline (0 h) and 4 h after a meal in scWAT from middle-aged males, analysed from a publicly available microarray dataset ( $n = 19$ ). Paired two-tailed t test (a, c) or Wilcoxon matched-pairs signed rank test (b).

(d, e) Spearman ( $\rho$  coefficient) (d) or Pearson ( $r$  coefficient) (e) correlations between the absolute postprandial change (4 h – 0 h) in expression values of *IL1B* and *CEBPD* (d) or *CEBPB* (e) in the same dataset as described in (a-c).

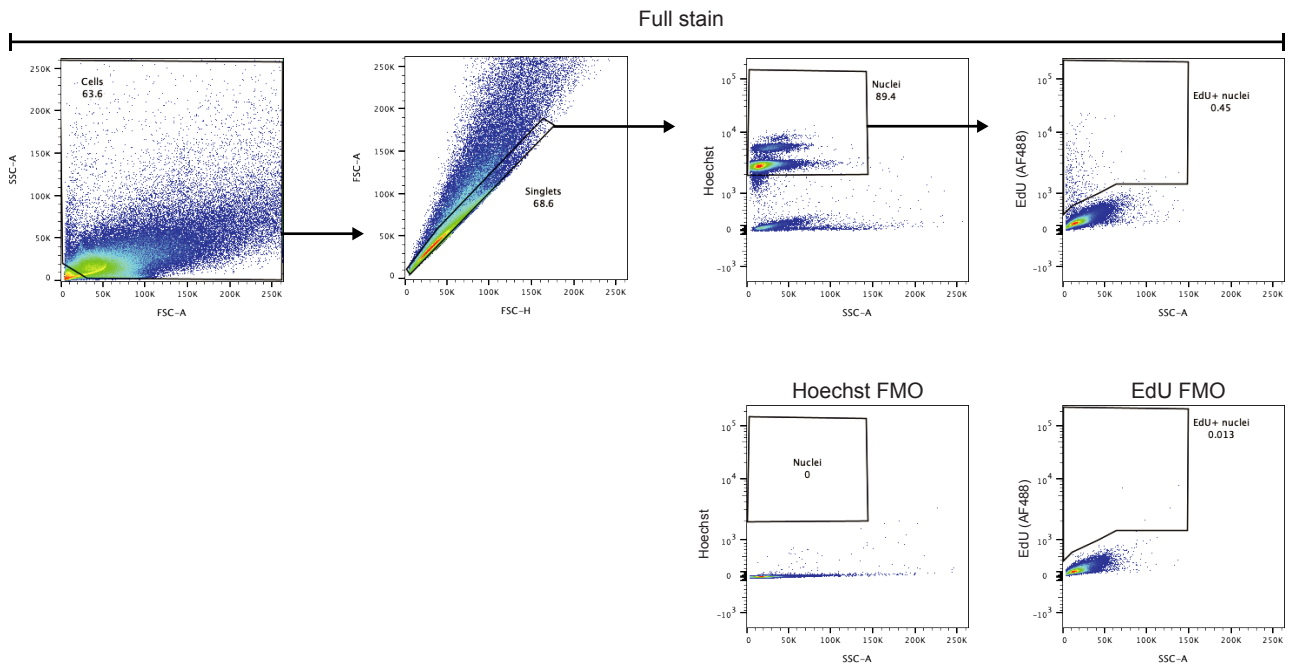

**Supplementary Fig. 9. FACS gating strategy for analysis of EdU<sup>+</sup> adipocyte nuclei.**

Representative FACS gating scheme to identify EdU<sup>+</sup> adipocyte nuclei in WAT of mice shown in Fig. 2r, s, u, v.

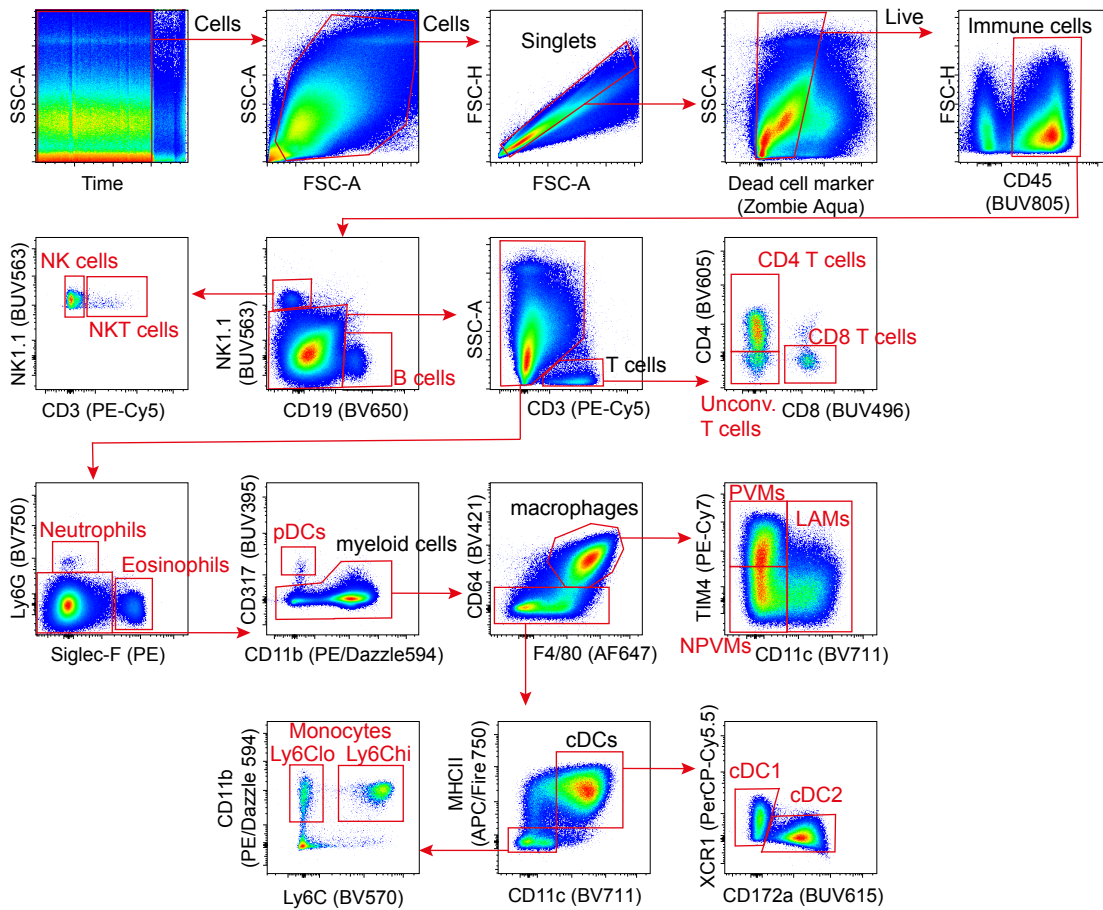

**Supplementary Fig. 10. FACS gating strategy for analysis of immune cell populations.**

Representative FACS gating scheme to identify immune cell populations in the stromal vascular fraction of WT and IL1R1-KO mice shown in Supplementary Fig. 3c, d.

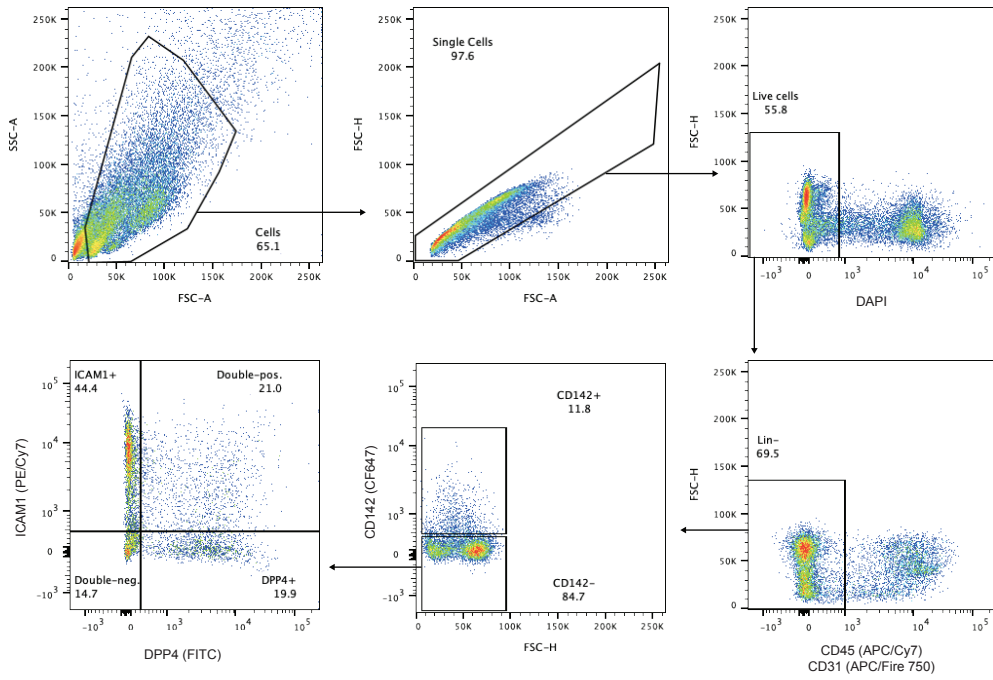

**Supplementary Fig. 11. FACS gating strategy for analysis of progenitor subpopulations.**

Representative FACS gating scheme to identify progenitor subpopulations in the stromal vascular fraction of WT and IL1R1-KO mice shown in Supplementary Fig. 3e-h.

**Supplementary Table 1. List of reagents**

| <b>Antibodies for FACS</b>                                | <b>SOURCE</b>           | <b>IDENTIFIER</b>                                   |
|-----------------------------------------------------------|-------------------------|-----------------------------------------------------|
| <i>Anti-mouse antibodies for immune cell panel</i>        |                         |                                                     |
| Anti-CD206-AF488 (Clone C068C2) (1:100)                   | Biolegend               | Cat# <a href="#">141710</a>                         |
| Anti-XCR1-PerCP-Cy5.5 (Clone ZET) (1:100)                 | Biolegend               | Cat# <a href="#">148208</a>                         |
| Anti-CD317-BUV395 (Clone 927) (1:100)                     | BD Biosciences          | Cat# <a href="#">747602</a>                         |
| Anti-CD8-BUV496 (Clone 53-6.7) (1:100)                    | BD Biosciences          | Cat# <a href="#">569181</a>                         |
| Anti-NK1.1-BUV563 (Clone PK136) (1:50)                    | BD Biosciences          | Cat# <a href="#">741233</a>                         |
| Anti-CD172a-BUV615 (Clone P84) (1:100)                    | BD Biosciences          | Cat# <a href="#">751214</a>                         |
| Anti-CD49b-BUV661 (Clone HMa2) (1:200)                    | BD Biosciences          | Cat# <a href="#">741523</a>                         |
| Anti-CD45-BUV805 (Clone 30-F11) (1:100)                   | BD Biosciences          | Cat# <a href="#">568336</a>                         |
| Anti-F4/80-AF647 (Clone Cl:A3-1) (1:10)                   | Bio-Rad<br>Laboratories | Cat# <a href="#">MCA497A64</a><br><a href="#">7</a> |
| Anti-MHCII-APC/Fire750 (Clone M5/114.15.2) (1:400)        | Biolegend               | Cat# <a href="#">107651</a>                         |
| Anti-CD64-BV421 (Clone X54-5/7.1) (1:50)                  | Biolegend               | Cat# <a href="#">139309</a>                         |
| Anti-Ly6C-BV570 (Clone HK1.4) (1:100)                     | Biolegend               | Cat# <a href="#">128030</a>                         |
| Anti-CD4-BV605 (Clone RM4-5) (1:50)                       | Biolegend               | Cat# <a href="#">100547</a>                         |
| Anti-CD19-BV650 (Clone 6D5) (1:100)                       | Biolegend               | Cat# <a href="#">115541</a>                         |
| Anti-CD11c-BV711 (Clone HL3) (1:25)                       | BD Biosciences          | Cat# <a href="#">563048</a>                         |
| Anti-Ly6G-BV750 (Clone 1A8) (1:200)                       | BD Biosciences          | Cat# <a href="#">747072</a>                         |
| Anti-CD49a-BV786 (Clone Ha31/8) (1:100)                   | BD Biosciences          | Cat# <a href="#">740919</a>                         |
| Anti-Siglec-F-PE (Clone E50-2440) (1:100)                 | BD Biosciences          | Cat# <a href="#">562068</a>                         |
| Anti-CD11b-PE/Dazzle594 (Clone M1/70) (1:200)             | Biolegend               | Cat# <a href="#">101256</a>                         |
| Anti-CD3e-PE-Cy5 (Clone 145-2C11) (1:50)                  | BD Biosciences          | Cat# <a href="#">553065</a>                         |
| Anti-TIM4-PE-Cy7 (Clone RMT4-54) (1:50)                   | Biolegend               | Cat# <a href="#">130009</a>                         |
| Anti-CD16/CD32 (Clone 2.4G2) (Mouse BD Fc Block™)         | BD Biosciences          | Cat# <a href="#">553142</a>                         |
| <i>Anti-mouse antibodies for progenitor subtype panel</i> |                         |                                                     |

|                                                        |                   |                                  |
|--------------------------------------------------------|-------------------|----------------------------------|
| Anti-CD45-APC/Cy7 (Clone 30-F11)<br>(1:1000)           | BioLegend         | Cat# <a href="#">103116</a>      |
| Anti-CD31-APC/Fire 750 (Clone MEC13.3)<br>(1:1000)     | BioLegend         | Cat# <a href="#">102528</a>      |
| Anti-CD142 (Polyclonal) (1:20)                         | Novus Biologicals | Cat# <a href="#">NBP2-15139</a>  |
| Anti-CD54 (ICAM-1)-PE/Cy7 (Clone<br>YN1/1.7.4) (1:100) | BioLegend         | Cat# <a href="#">116122</a>      |
| Anti-CD26 (DPP-4)-FITC (Clone H194-112)<br>(1:200)     | BioLegend         | Cat# <a href="#">137806</a>      |
| FcR Blocking reagent, mouse (1:10)                     | Miltenyi Biotec   | Cat# <a href="#">130-092-575</a> |
| <i>Anti-human antibodies for progenitor sorting</i>    |                   |                                  |
| Anti-CD31-PE-Cy7 (Clone WM59) (1:12.5)                 | BD Biosciences    | Cat# <a href="#">563651</a>      |
| Anti-CD34-PE-CF594 (Clone 563) (1:250)                 | BD Biosciences    | Cat# <a href="#">562449</a>      |
| Anti-CD45-AF700 (Clone HI30) (1:100)                   | BD Biosciences    | Cat# <a href="#">560566</a>      |

| <b>Antibodies for other applications</b>                                  |                             |                                  |
|---------------------------------------------------------------------------|-----------------------------|----------------------------------|
| CD45 MicroBeads, mouse (Clone 30F11.1)                                    | Miltenyi Biotec             | Cat# <a href="#">130-052-301</a> |
| Anti-C/EBP $\delta$ (Clone C-6) (Western Blot:<br>1:500; ChIP: 3 $\mu$ g) | Santa Cruz<br>Biotechnology | Cat# <a href="#">sc-365546</a>   |
| Anti-C/EBP $\beta$ (LAP) (Polyclonal) (Western<br>Blot 1:1000)            | Cell Signaling              | Cat# <a href="#">3087</a>        |
| Anti-Lamin A/C (Clone 4C11) (Western Blot<br>1:1000)                      | Cell Signaling              | Cat# <a href="#">4777</a>        |
| Anti-P-CREB (S133) (Clone 87G3) (Western<br>Blot 1:1000)                  | Cell Signaling              | Cat# <a href="#">9198</a>        |
| Anti-CREB (Clone 48H2) (Western Blot<br>1:1000)                           | Cell Signaling              | Cat# <a href="#">9197</a>        |
| Anti-rabbit IgG, HRP-linked (Western Blot<br>1:10000)                     | Cell Signaling              | Cat# <a href="#">7074</a>        |
| Anti-mouse IgG, HRP-linked (Polyclonal)<br>(Western Blot 1:10000)         | Invitrogen                  | Cat# <a href="#">G21040</a>      |



|                                                   |                             |                             |
|---------------------------------------------------|-----------------------------|-----------------------------|
| Anti-C/EBP $\beta$ (Polyclonal) (ChIP: 3 $\mu$ g) | Santa Cruz<br>Biotechnology | Cat# <a href="#">sc-150</a> |
| Normal Mouse IgG (Polyclonal) (ChIP: 3 $\mu$ g)   | EMD Millipore               | Cat# <a href="#">12-371</a> |
| Normal Rabbit IgG (Polyclonal) (ChIP: 3 $\mu$ g)  | EMD Millipore               | Cat# <a href="#">12-370</a> |

| <b>Oligonucleotides</b>           |                    |                                                                     |
|-----------------------------------|--------------------|---------------------------------------------------------------------|
| <i>PPARG</i> (Taqman probe)       | Applied Biosystems | Hs01115513_m1                                                       |
| <i>ADIPOQ</i> (Taqman probe)      | Applied Biosystems | Hs00605917_m1                                                       |
| <i>PLIN1</i> (Taqman) probe       | Applied Biosystems | Hs00193510_m1                                                       |
| <i>PPIA</i> (Taqman probe)        | Applied Biosystems | Hs041994521_s1                                                      |
| <i>FABP4</i> (Taqman probe)       | Applied Biosystems | Hs01086177_m1                                                       |
| <i>FASN</i> (Taqman probe)        | Applied Biosystems | Hs01005622_m1                                                       |
| <i>ACACB</i> (Taqman probe)       | Applied Biosystems | Hs00153715_m1                                                       |
| <i>CCL2</i> (Taqman probe)        | Applied Biosystems | Hs00234140_m1                                                       |
| <i>IL6</i> (Taqman probe)         | Applied Biosystems | Hs00985639_m1                                                       |
| <i>CSF3</i> (Taqman probe)        | Applied Biosystems | Hs00738432_g1                                                       |
| <i>CCL5</i> (Taqman probe)        | Applied Biosystems | Hs00174575_m1                                                       |
| <i>CXCL12</i> (Taqman probe)      | Applied Biosystems | Hs03676656_mH                                                       |
| <i>NFKB1</i> (Taqman probe)       | Applied Biosystems | Hs00765730_m1                                                       |
| <i>IL1RI</i> (Taqman probe)       | Applied Biosystems | Hs00168392_m1                                                       |
| <i>PPARG</i> (SYBR Green primer)  | Sigma-Aldrich      | F:CCCAGAAAG<br>CGATTCCTTCA<br>C;<br>R:AGCTGATCC<br>CAAAGTTGGTG<br>G |
| <i>ADIPOQ</i> (SYBR Green primer) | Sigma-Aldrich      | F:GGTCTTATTG<br>GTCCTAAGGG;<br>R:GTAGAAGAT<br>CTTGGTAAAGC<br>G      |

|                                  |               |                                                                          |
|----------------------------------|---------------|--------------------------------------------------------------------------|
| <i>PLIN1</i> (SYBR Green primer) | Sigma-Aldrich | F:TGGAGACTG<br>AGGAGAACAA<br>G;<br>R:ATGTCACAG<br>CCGAGATGG              |
| <i>PPIA</i> (SYBR Green primer)  | Sigma-Aldrich | F:CCCACCGTGT<br>TCTTCGACATT;<br>R:GGACCCGTA<br>TGCTTTAGGAT<br>GA         |
| <i>FABP4</i> (SYBR Green primer) | Sigma-Aldrich | F:CAAGAGCAC<br>CATAACCTTAG<br>;<br>R:CTCGTTTTCT<br>CTTTATGGTGG           |
| <i>CCL2</i> (SYBR Green primer)  | Sigma-Aldrich | F:AGGTGACTG<br>GGGCATTGAT;<br>R:GCCTCCAGC<br>ATGAAAGTCTC                 |
| <i>IL6</i> (SYBR Green primer)   | Sigma-Aldrich | F:ACTCACCTCT<br>TCAGAACGAAT<br>TG;<br>R:CCATCTTTGG<br>AAGG TTCAGGT<br>TG |
| <i>CEBPD</i> (SYBR Green primer) | Sigma-Aldrich | F:CAGACTTTTC<br>AGACAAACCC;<br>R:TTTCGATTTC<br>AAATGCTGC                 |
| <i>CEBPB</i> (SYBR Green primer) | Sigma-Aldrich | F:ATAAACTCTC<br>TGCTTCTCCC;<br>R:CCGTAGGAA<br>CATCTTTAAGC                |

|                                   |               |                                                                       |
|-----------------------------------|---------------|-----------------------------------------------------------------------|
| <i>CEBPA</i> (SYBR Green primer)  | Sigma-Aldrich | F:AGCCTTGTTT<br>GTACTGTATG;<br>R:AAAATGGTG<br>GTTTAGCAGAG             |
| <i>DDIT3</i> (SYBR Green primer)  | Sigma-Aldrich | F:CTTTTCCAGA<br>CTGATCCAAC;<br>R:GATTCTTCCT<br>CTTCATTTCCA<br>G       |
| <i>Il1r1</i> (SYBR Green primer)  | Microsynth    | F:GCACGCCCA<br>GGAGAATATG<br>A;<br>R:AGAGGACAC<br>TTGCGAATATC<br>AA   |
| <i>Adipoq</i> (SYBR Green primer) | Microsynth    | F:TGACGACAC<br>CAAAGGGCTC<br>;<br>R:CACAAGTTC<br>CCTTGGGTGGA          |
| <i>Fasn</i> (SYBR Green primer)   | Microsynth    | F:GCTGCCGAA<br>ACTTCAGGAAA<br>T;<br>R:AGAGACGTG<br>TCACTCCTGGA<br>CTT |
| <i>Lep</i> (SYBR Green primer)    | Microsynth    | F:GAGACCCCT<br>GTGTCGGTTC;<br>R:GAGACCCCT<br>GTGTCGGTTC               |
| <i>Plin1</i> (SYBR Green primer)  | Microsynth    | F:CTGTGTGCAA<br>TGCCTATGAGA<br>;                                      |

|                                                 |               |                                                                       |
|-------------------------------------------------|---------------|-----------------------------------------------------------------------|
|                                                 |               | R:CTGGAGGGT<br>ATTGAAGAGCC<br>G                                       |
| <i>Hprt</i> (SYBR Green primer)                 | Microsynth    | F:TCAGTCAACG<br>GGGGACATAA<br>A;<br>R:GGGGCTGTA<br>CTGCTTAACCA<br>G   |
| <i>Gapdh</i> (SYBR Green primer)                | Microsynth    | F:AGGTCGGTGT<br>GAACGGATTTG<br>;<br>R:TGTAGACCA<br>TGTAGTTGAGG<br>TCA |
| <i>Pparg</i> (SYBR Green primer)                | Microsynth    | F:GCCTATGAGC<br>ACTTCACAAGA<br>AAT;<br>R:GGAATGCGA<br>GTGGTCTTCCA     |
| <i>Il6</i> (SYBR Green primer)                  | Microsynth    | F:GCCTTCTTGG<br>GACTGATGCT;<br>R:TGCCATTGCA<br>CAACTCTTTTC            |
| <i>Cd45</i> (SYBR Green primer)                 | Microsynth    | F:ATGGTCCTCT<br>GAATAAAGCCC<br>A;<br>R:TAGCACTATT<br>GGTAGGCICC       |
| <i>ADIPOQ</i> (SYBR Green primer for ChIP-qPCR) | Sigma-Aldrich | F:GGCTTTCACA<br>ATGTCACTGAC<br>TG;                                    |

|                                                |               |                                                                 |
|------------------------------------------------|---------------|-----------------------------------------------------------------|
|                                                |               | R:GCTGTAGCT<br>ATTGCACAAGG<br>TG                                |
| <i>PPARG</i> (SYBR Green primer for ChIP-qPCR) | Sigma-Aldrich | F:GATGTTTTGG<br>GGCTTAATGGC<br>A;<br>R:TGGCTGGGT<br>CTGAACATCAC |

| <b>Chemicals, peptides and recombinant proteins</b>                  |                                           |                           |
|----------------------------------------------------------------------|-------------------------------------------|---------------------------|
| Bovine Serum Albumin (fatty acid free)                               | Sigma-Aldrich                             | Cat#A6003                 |
| Bovine Serum Albumin                                                 | Sigma-Aldrich                             | Cat#A4503                 |
| Collagenase Type I (for WAT samples from <i>in vivo</i> experiments) | Worthington<br>Biochemical<br>Corporation | Cat#ILS004197             |
| Collagenase from <i>Clostridium histolyticum</i>                     | Sigma-Aldrich                             | Cat#C0130                 |
| Insulin ( <i>in vivo</i> treatments)                                 | NovoNordisk                               | Actrapid HM               |
| Recombinant Mouse IL-1 $\beta$                                       | R&D Systems                               | Cat#401-mL-010            |
| <sup>3</sup> H-2-deoxy-glucose                                       | PerkinElmer                               | Cat#NET328A001<br>MC      |
| Phosphatase inhibitor cocktail 2                                     | Sigma-Aldrich                             | Cat#P5726                 |
| Poly-Prep® Columns, AG® 1-X8                                         | Bio-Rad                                   | Cat# 7316212              |
| Ultima Gold                                                          | PerkinElmer                               | Cat#6013326               |
| IL1Ra ( <i>in vivo</i> treatments)                                   | Sobi                                      | Kineret®                  |
| Human recombinant IL-1 $\beta$ ( <i>in vitro</i> treatments)         | Sigma-Aldrich                             | Cat#I9401 or<br>Cat#H6291 |
| Human recombinant IFN- $\gamma$                                      | Sigma-Aldrich                             | Cat#I17001                |
| Human recombinant IL-6                                               | Sigma-Aldrich                             | Cat#SCU0001               |
| Human recombinant MCP-1                                              | Sigma-Aldrich                             | Cat#SRP3109               |
| Human recombinant TNF- $\alpha$                                      | Sigma-Aldrich                             | Cat#T6674                 |
| LPS                                                                  | Sigma-Aldrich                             | Cat#L4524                 |

|                                                        |                              |                      |
|--------------------------------------------------------|------------------------------|----------------------|
| Human recombinant IL-1Ra ( <i>in vitro</i> treatments) | Sigma-Aldrich                | Cat#SRP3084          |
| U0126                                                  | Cell Signaling               | Cat#9903             |
| SB203580                                               | Sigma-Aldrich                | Cat#S8307            |
| JNK Inhibitor VIII                                     | EMD Millipore                | Cat#420135           |
| Hoechst 33342                                          | Invitrogen                   | Cat#H3570            |
| Bodipy <sup>TM</sup> 493/503                           | Invitrogen                   | Cat#D3922            |
| HCS LipidTOX <sup>TM</sup> Red neutral lipid stain     | Invitrogen                   | Cat#H34476           |
| Pierce <sup>TM</sup> RIPA buffer                       | Thermo Scientific            | Cat#89901            |
| 7-aminoactinomycin D                                   | BD Biosciences               | Cat#559925           |
| Zombie Aqua <sup>TM</sup> Fixable Viability Kit        | Biolegend                    | Cat#423102           |
| DAPI Staining Solution                                 | Miltenyi Biotec              | Cat#130-111-579      |
| D-[3- <sup>3</sup> H]-glucose                          | PerkinElmer                  | Cat#NET331A001<br>MC |
| OptiPhase HiSafe 3                                     | PerkinElmer                  | Cat#1200.437         |
| Chow Diet                                              | Kliba Nafag                  | Cat#3436             |
| High-Fat Diet                                          | ssniff Spezialdiäten<br>GmbH | Cat#E15742-34        |

| <b>Critical Commercial Assays</b>             |                         |               |
|-----------------------------------------------|-------------------------|---------------|
| RNeasy Lipid Tissue Mini Kit                  | Qiagen                  | Cat#74804     |
| RNeasy Micro Kit                              | Qiagen                  | Cat#74004     |
| RNeasy Plus Universal Mini Kit                | Qiagen                  | Cat#73404     |
| NucleoSpin RNA, Mini kit for RNA purification | Macherey-Nagel          | Cat#740955    |
| GoScript <sup>TM</sup> Reverse Transcriptase  | Promega                 | Cat#A2801     |
| iScript cDNA synthesis kit                    | Bio-Rad<br>Laboratories | Cat#1708891   |
| GoTaq <sup>®</sup> qPCR                       | Promega                 | Cat#A6001     |
| iQ SYBR Green Supermix                        | Bio-Rad<br>Laboratories | Cat#1708884   |
| TaqMan Universal PCR Master Mix               | Applied Biosystems      | Cat#43-181-57 |

|                                                             |                   |                |
|-------------------------------------------------------------|-------------------|----------------|
| Click-iT™ Plus EdU Cell Proliferation Kit                   | Invitrogen        | Cat#C10637     |
| Pierce™ BCA Protein Assay Kit                               | Thermo Scientific | Cat#23227      |
| MAGNA ChIP HiSens Chromatin Immunoprecipitation Kit         | Merck             | Cat#17-10460   |
| eBioscience™ Foxp3/Transcription Factor Staining Buffer Set | Invitrogen        | Cat#00-5523-00 |
| Mix-n-Stain™ CF™ 647 Antibody Labeling Kit                  | Sigma-Aldrich     | Cat#MX647S100  |
